# Supplementary material for: A knowledge-based scoring function for protein-RNA interactions derived from a statistical mechanics-based iterative method
Source: PubMed Central journal article supplement (PMC3985650; doi:10.1093/nar/gku077), 2014-01-28

## Supplementary Data:

### **A knowledge-based scoring function for protein-RNA interactions derived from a statistical mechanics-based iterative method**

Sheng-You Huang, and Xiaoqin Zou\*

Department of Physics and Astronomy, Department of Biochemistry, Dalton Cardiovascular Research Center,  
and Informatics Institute, University of Missouri, Columbia, MO 65211

Key Words: Scoring function, protein-RNA interactions, molecular docking, statistical potential,  
molecular recognition.

Running title: An iterative knowledge-based scoring function for protein-RNA interactions

---

\*Corresponding Author; Email: [zoux@missouri.edu](mailto:zoux@missouri.edu)

Table S1: PDB codes of the 110 protein-RNA complexes in the training set for deriving ITScore-PR.

|      |      |      |      |      |      |      |      |      |      |      |      |
|------|------|------|------|------|------|------|------|------|------|------|------|
| 1A9N | 1ASY | 1B23 | 1B7F | 1DI2 | 1DRZ | 1EC6 | 1FEU | 1I6U | 1L9A | 1M8W | 1MFQ |
| 1MFQ | 1MJI | 1MZP | 1P6V | 1RLG | 1RPU | 1SDS | 1TFW | 1TTT | 1U6B | 1VFG | 1YYW |
| 1YZ9 | 1ZBH | 2AB4 | 2ASB | 2BGG | 2BS0 | 2BU1 | 2BX2 | 2D6F | 2DER | 2DLC | 2E9T |
| 2EZ6 | 2F8K | 2GJE | 2I82 | 2I91 | 2IZN | 2NUE | 2NZ4 | 2OZB | 2PJP | 2PY9 | 2W2H |
| 2XLK | 2Y8Y | 2ZH6 | 2ZI0 | 2ZZN | 3ADI | 3AEV | 3AGV | 3AKZ | 3AM1 | 3AMT | 3BOY |
| 3BSO | 3BT7 | 3CUL | 3CZ3 | 3DH3 | 3EGZ | 3EQT | 3HAX | 3HHN | 3I5X | 3IAB | 3IEV |
| 3IVK | 3K0J | 3K49 | 3KFU | 3KS8 | 3KTW | 3L25 | 3MXH | 3NCU | 3NNH | 3O7V | 3OG8 |
| 3OIN | 3QJJ | 3QJL | 3QSY | 3R2C | 3RW6 | 3SIU | 3TRZ | 3TS2 | 3TUP | 3UMY | 3V74 |
| 3V7E | 3VJR | 4DB2 | 4ED5 | 4ENN | 4ERD | 4FVU | 4FY2 | 4GHA | 4GHL | 4H5P | 5MSF |
| 6MSF | 7MSF |      |      |      |      |      |      |      |      |      |      |

Table S2: PDB codes of the test cases in the two RPDOCK docking decoy sets that are based on the protein-RNA docking benchmark by Perez-Cano et al. and the protein-RNA docking benchmark by Huang and Zou, respectively.

| Decoy set                                   | PDB codes |      |      |      |      |      |      |      |      |      |      |      |
|---------------------------------------------|-----------|------|------|------|------|------|------|------|------|------|------|------|
| Based on the benchmark by Perez-Cano et al. | 1DFU      | 2FMT | 1U0B | 1B7F | 1E7K | 1EC6 | 1HC8 | 1HVU | 1JBR | 1K8W | 1KOG | 1KQ2 |
|                                             | 1M8V      | 1M8W | 1N78 | 1Q2R | 1T4L | 1U63 | 1WNE | 1WPU | 1WSU | 1YVP | 2AD9 | 2ADB |
|                                             | 2ADC      | 2ASB | 2AZ0 | 2BGG | 2BH2 | 2BU1 | 2CZJ | 2ERR | 2F8K | 2GJE | 2GJW | 2HGH |
|                                             | 2I91      | 2QUX | 2R7R | 3BO2 | 3BSB | 3BSX | 3BX2 |      |      |      |      |      |
| Based on the benchmark by Huang and Zou     | 1C0A      | 1DFU | 1E80 | 1F7Y | 1FFY | 1G1X | 1GAX | 1HQ1 | 1JBS | 1JID | 1K8W | 1KOG |
|                                             | 1LNG      | 1MMS | 1N78 | 1Q2R | 1QTQ | 1R3E | 1S03 | 1SJ3 | 1T0K | 1YVP | 2ANR | 2AZ0 |
|                                             | 2BH2      | 2CSX | 2CZJ | 2FK6 | 2GJW | 2QUX | 2RFK | 2XDB | 2ZM5 | 2ZUE | 3EPH | 3FOZ |
|                                             | 3HHZ      | 3LRR | 3LWR | 3MOJ | 3OL9 | 3OVB | 1R9F | 1RC7 | 1UN6 | 2FMT | 2VPL | 2ZZM |
|                                             | 3ADD      | 3FTF |      |      |      |      |      |      |      |      |      |      |

Table S3: Protein-RNA atom pair occurrences in the native structures of the training database for deriving ITScore-PR. The rows refer to protein atom types. The columns stand for RNA atom types.

| Protein<br>atom types | RNA atom types |        |        |       |       |       |       |       |       |       |       |       |
|-----------------------|----------------|--------|--------|-------|-------|-------|-------|-------|-------|-------|-------|-------|
|                       | C2X            | Car    | C3X    | N2N   | N2X   | Nar   | N21   | O2    | O31   | O32   | O2-   | P     |
| C2+                   | 2210           | 7498   | 10946  | 2235  | 1637  | 3154  | 1005  | 2161  | 2239  | 6503  | 4435  | 2219  |
| C2-                   | 1663           | 5713   | 9353   | 1689  | 1265  | 2488  | 815   | 1654  | 2067  | 5511  | 3791  | 1892  |
| C2M                   | 16957          | 54890  | 90928  | 17187 | 11421 | 23190 | 7406  | 17208 | 19801 | 53707 | 35816 | 17880 |
| C2S                   | 1956           | 5937   | 8746   | 1948  | 1256  | 2441  | 768   | 1925  | 1846  | 5233  | 3387  | 1713  |
| Car                   | 10539          | 33528  | 54646  | 10674 | 7485  | 14260 | 4415  | 10621 | 12434 | 31638 | 20960 | 10266 |
| C3C                   | 31019          | 100306 | 163501 | 31453 | 21594 | 42768 | 13574 | 31774 | 36189 | 96476 | 64376 | 31969 |
| C3A                   | 17259          | 56032  | 91925  | 17609 | 11749 | 23682 | 7546  | 17505 | 20035 | 54289 | 36064 | 17918 |
| C3X                   | 7933           | 26468  | 41418  | 8045  | 5679  | 11228 | 3610  | 7899  | 8816  | 24540 | 16462 | 8183  |
| N2N                   | 17262          | 55671  | 92447  | 17522 | 11538 | 23558 | 7513  | 17370 | 20012 | 54455 | 36141 | 18094 |
| N2+                   | 4547           | 15451  | 22130  | 4577  | 3372  | 6485  | 2054  | 4499  | 4563  | 13151 | 8916  | 4462  |
| N2X                   | 1921           | 5939   | 8702   | 1946  | 1265  | 2470  | 775   | 1910  | 1809  | 5142  | 3426  | 1723  |
| Nar                   | 1318           | 4268   | 6810   | 1344  | 982   | 1834  | 572   | 1342  | 1465  | 3992  | 2620  | 1316  |
| N21                   | 2083           | 7027   | 10464  | 2093  | 1513  | 2936  | 982   | 2019  | 2146  | 6270  | 4275  | 2147  |
| N3+                   | 2255           | 7710   | 11725  | 2288  | 1663  | 3289  | 1073  | 2244  | 2376  | 6970  | 4876  | 2384  |
| O2M                   | 16844          | 54203  | 89180  | 17040 | 11319 | 23112 | 7395  | 17092 | 19577 | 52972 | 35387 | 17612 |
| O2S                   | 1872           | 5838   | 8614   | 1906  | 1219  | 2393  | 767   | 1846  | 1785  | 5108  | 3351  | 1706  |
| O3H                   | 3139           | 10333  | 15848  | 3163  | 2194  | 4398  | 1376  | 3114  | 3436  | 9282  | 5989  | 3016  |
| O2-                   | 3376           | 11745  | 19088  | 3465  | 2591  | 5116  | 1669  | 3409  | 4226  | 11284 | 7758  | 3850  |
| S31                   | 160            | 585    | 875    | 169   | 128   | 279   | 97    | 167   | 212   | 501   | 306   | 155   |
| S30                   | 257            | 796    | 1403   | 258   | 189   | 354   | 111   | 275   | 300   | 840   | 568   | 285   |

Table S4: Score-RMSD correlation coefficients of ITScore-PR and five other scoring functions for different RMSD cutoffs, using the ROSETTA docking decoys generated by the Varani group. The results for DARS-RNP, QUASI-RNP, the Varani potential, and the Fernandez potential were taken from the study by Tuszynska and Bujnicki (ref. 45).

| PDB<br>code | RMSD<br>(Å) | Correlation coefficient |      |          |           |        |           |
|-------------|-------------|-------------------------|------|----------|-----------|--------|-----------|
|             |             | <b>ITScore-PR</b>       | dRNA | DARS-RNP | QUASI-RNP | Varani | Fernandez |
| 1URN        | 5           | 0.84                    | 0.74 | 0.77     | 0.7       | 0.37   | -0.56     |
|             | 10          | 0.89                    | 0.82 | 0.83     | 0.79      | 0.27   | -0.24     |
|             | 20          | 0.84                    | 0.81 | 0.81     | 0.79      | 0.21   | -0.1      |
| 1E6C        | 5           | 0.79                    | 0.75 | 0.81     | 0.79      | 0.57   | -0.08     |
|             | 10          | 0.86                    | 0.87 | 0.9      | 0.89      | 0.38   | -0.05     |
|             | 20          | 0.80                    | 0.84 | 0.87     | 0.86      | 0.31   | -0.02     |
| 1FXL        | 5           | 0.97                    | 0.96 | 0.94     | 0.95      | 0.87   | 0.61      |
|             | 10          | 0.96                    | 0.97 | 0.96     | 0.96      | 0.82   | 0.74      |
|             | 20          | 0.92                    | 0.94 | 0.93     | 0.94      | 0.7    | 0.83      |
| 1CVJ        | 5           | 0.99                    | 0.96 | 0.96     | 0.96      | 0.5    | 0.85      |
|             | 10          | 0.96                    | 0.98 | 0.97     | 0.97      | 0.61   | 0.92      |
|             | 20          | 0.92                    | 0.94 | 0.93     | 0.93      | 0.46   | 0.9       |
| 1JID        | 5           | 0.70                    | 0.63 | 0.58     | 0.58      | 0.35   | 0.33      |
|             | 10          | 0.75                    | 0.77 | 0.72     | 0.71      | 0.3    | 0.39      |
|             | 20          | 0.71                    | 0.76 | 0.7      | 0.69      | 0.27   | 0.29      |
| Average     | 5           | 0.86                    | 0.81 | 0.81     | 0.80      | 0.53   | 0.23      |
|             | 10          | 0.89                    | 0.88 | 0.88     | 0.87      | 0.47   | 0.35      |
|             | 20          | 0.84                    | 0.86 | 0.85     | 0.84      | 0.39   | 0.38      |

Table S5: The number of hits ( $N_{\text{hits}}$ ) and the best interface RMSD ( $I_{\text{rmsd}}$ ) of the hits in the bound and unbound RNA binding decoys for the 72 complexes in the protein-RNA docking benchmark by Huang and Zou.

| PDB code | Type | Bound             |                   | Unbound           |                   | PDB code | Type      | Bound             |                   | Unbound           |                   |
|----------|------|-------------------|-------------------|-------------------|-------------------|----------|-----------|-------------------|-------------------|-------------------|-------------------|
|          |      | $N_{\text{hits}}$ | $I_{\text{rmsd}}$ | $N_{\text{hits}}$ | $I_{\text{rmsd}}$ |          |           | $N_{\text{hits}}$ | $I_{\text{rmsd}}$ | $N_{\text{hits}}$ | $I_{\text{rmsd}}$ |
| 1QTQ     | easy | 5                 | 0.066             | 9                 | 0.401             | 2XDB     | easy      | 11                | 0.093             | 13                | 0.380             |
| 1FFY     | easy | 5                 | 0.045             | 8                 | 0.828             | 2ZNI     | easy      | 7                 | 0.059             | 5                 | 1.556             |
| 1G1X     | easy | 8                 | 0.150             | 7                 | 1.075             | 2ZUE     | easy      | 5                 | 0.043             | 7                 | 0.199             |
| 1N78     | easy | 7                 | 0.084             | 7                 | 1.945             | 1F7Y     | easy      | 15                | 0.205             | 22                | 0.615             |
| 1GAX     | easy | 6                 | 0.045             | 8                 | 0.437             | 3CIY     | easy      | 4                 | 0.164             | 3                 | 1.731             |
| 1H4S     | easy | 6                 | 0.041             | 4                 | 2.310             | 3DD2     | easy      | 10                | 0.134             | 8                 | 0.998             |
| 1SJ3     | easy | 2                 | 0.079             | 10                | 0.380             | 3EPH     | easy      | 17                | 0.080             | 16                | 0.251             |
| 1MMS     | easy | 27                | 0.054             | 19                | 1.685             | 3HHZ     | easy      | 9                 | 0.043             | 13                | 0.943             |
| 1S03     | easy | 14                | 0.203             | 18                | 1.243             | 1HQ1     | easy      | 14                | 0.073             | 9                 | 0.411             |
| 1J1U     | easy | 5                 | 0.105             | 2                 | 1.202             | 3LRR     | easy      | 32                | 0.088             | 52                | 0.439             |
| 1JBS     | easy | 8                 | 0.156             | 21                | 0.981             | 3MOJ     | easy      | 31                | 0.195             | 32                | 0.978             |
| 1JID     | easy | 9                 | 0.105             | 10                | 2.931             | 3OL9     | easy      | 31                | 0.047             | 34                | 0.391             |
| 1K8W     | easy | 28                | 0.062             | 18                | 1.395             | 1E8O     | easy      | 2                 | 0.079             | 5                 | 1.439             |
| 1KOG     | easy | 6                 | 0.115             | 4                 | 1.893             | 1F7U     | medium    | 9                 | 0.075             | 5                 | 2.622             |
| 1LNG     | easy | 8                 | 0.098             | 11                | 0.693             | 1IL2     | medium    | 6                 | 0.107             | 2                 | 2.786             |
| 2CZJ     | easy | 8                 | 0.357             | 4                 | 3.023             | 1R9F     | medium    | 21                | 0.166             | 3                 | 2.900             |
| 1Q2R     | easy | 24                | 0.154             | 17                | 1.079             | 1SER     | medium    | 4                 | 0.182             | 5                 | 2.732             |
| 2ZM5     | easy | 14                | 0.048             | 14                | 0.340             | 1UN6     | medium    | 10                | 0.156             | 2                 | 6.751             |
| 1R3E     | easy | 11                | 0.046             | 21                | 0.629             | 2UWM     | medium    | 3                 | 0.070             | 4                 | 3.636             |
| 3LWR     | easy | 8                 | 0.041             | 8                 | 0.428             | 2ZZM     | medium    | 11                | 0.113             | 11                | 1.607             |
| 1T0K     | easy | 15                | 0.242             | 22                | 1.113             | 2NUG     | medium    | 12                | 0.024             | 14                | 3.096             |
| 3OVB     | easy | 17                | 0.087             | 26                | 0.385             | 2BTE     | medium    | 5                 | 0.185             | 4                 | 3.155             |
| 3FOZ     | easy | 12                | 0.055             | 17                | 0.356             | 2ZKO     | medium    | 22                | 0.157             | 1                 | 5.157             |
| 1YVP     | easy | 17                | 0.103             | 9                 | 1.763             | 2FMT     | medium    | 3                 | 0.095             | 2                 | 2.501             |
| 1C0A     | easy | 4                 | 0.060             | 4                 | 1.012             | 2VPL     | medium    | 23                | 0.125             | 9                 | 2.062             |
| 2AKE     | easy | 5                 | 0.177             | 3                 | 0.737             | 1RC7     | medium    | 20                | 0.197             | 25                | 4.406             |
| 2ANR     | easy | 5                 | 0.107             | 9                 | 0.327             | 3ADD     | medium    | 6                 | 0.074             | 7                 | 2.557             |
| 2AZ0     | easy | 15                | 0.108             | 18                | 1.146             | 3FTF     | medium    | 23                | 0.147             | 27                | 3.100             |
| 2BH2     | easy | 18                | 0.041             | 16                | 1.398             | 3HL2     | medium    | 4                 | 0.383             | 10                | 2.623             |
| 2CSX     | easy | 5                 | 0.225             | 7                 | 0.473             | 1H3E     | difficult | 3                 | 0.136             | 2                 | 21.279            |
| 2DU3     | easy | 2                 | 0.174             | 3                 | 0.612             | 2HW8     | difficult | 27                | 0.109             | 0                 | –                 |
| 2FK6     | easy | 7                 | 0.190             | 5                 | 1.129             | 1OOA     | difficult | 12                | 0.125             | 2                 | 6.138             |
| 1DFU     | easy | 32                | 0.127             | 59                | 0.948             | 1U0B     | difficult | 6                 | 0.062             | 3                 | 4.456             |
| 2GJW     | easy | 16                | 0.079             | 4                 | 3.146             | 2IPY     | difficult | 3                 | 0.062             | 0                 | –                 |
| 2QUX     | easy | 7                 | 0.044             | 2                 | 0.654             | 2R8S     | difficult | 5                 | 0.111             | 0                 | –                 |
| 2RFK     | easy | 7                 | 0.075             | 15                | 1.295             | 2V3C     | difficult | 7                 | 0.100             | 0                 | –                 |

Table S6: The rankings and accuracy qualities of the first successful predictions for the *bound* cases on the protein-RNA docking benchmark by Huang and Zou, in which the quality ‘1’ stands for high accuracy, ‘2’ for medium accuracy, ‘3’ for acceptable accuracy and ‘4’ for incorrect prediction based on the CAPRI criteria.

| PDB<br>code | ITScore-PR |         | dRNA |         | DARS-RNP |         | QUASI-RNP |         | ZDOCK 2.1 |         | PMF  |         |
|-------------|------------|---------|------|---------|----------|---------|-----------|---------|-----------|---------|------|---------|
|             | rank       | quality | rank | quality | rank     | quality | rank      | quality | rank      | quality | rank | quality |
| 1QTQ        | 1          | 1       | 1    | 1       | 1        | 1       | 1         | 1       | 1         | 1       | 1    | 1       |
| 1FFY        | 1          | 1       | 1    | 1       | 1        | 1       | 1         | 1       | 1         | 1       | 1    | 1       |
| 1G1X        | 1          | 1       | 1    | 1       | 2        | 1       | 4         | 1       | 8         | 1       | 3    | 1       |
| 1N78        | 1          | 1       | 1    | 1       | 1        | 1       | 1         | 1       | 1         | 1       | 21   | 3       |
| 1GAX        | 1          | 1       | 1    | 1       | 1        | 1       | 1         | 1       | 1         | 1       | 30   | 1       |
| 1H4S        | 1          | 1       | 11   | 1       | 10       | 1       | 16        | 1       | 8         | 2       | 31   | 3       |
| 1SJ3        | 1          | 1       | 1    | 1       | 2        | 1       | 5         | 1       | 7         | 2       | 1    | 1       |
| 1MMS        | 1          | 1       | 1    | 1       | 1        | 1       | 1         | 1       | 1         | 1       | 25   | 3       |
| 1S03        | 1          | 1       | 1    | 1       | 2        | 1       | 4         | 1       | 2         | 1       | 19   | 3       |
| 1J1U        | 1          | 1       | 201  | 1       | 17       | 1       | 254       | 1       | 131       | 2       | 265  | 2       |
| 1JBS        | 11         | 1       | 3    | 3       | 1        | 2       | 1         | 1       | 57        | 3       | 253  | 3       |
| 1JID        | 1          | 1       | 1    | 1       | 5        | 1       | 13        | 1       | 67        | 2       | 11   | 3       |
| 1K8W        | 1          | 1       | 1    | 1       | 1        | 1       | 1         | 1       | 1         | 1       | 55   | 3       |
| 1KOG        | 1          | 1       | 26   | 1       | 3        | 1       | 40        | 1       | 2         | 1       | 14   | 3       |
| 1LNG        | 1          | 1       | 1    | 1       | 1        | 1       | 1         | 1       | 2         | 1       | 6    | 1       |
| 2CZJ        | 1          | 1       | 14   | 1       | 1        | 1       | 6         | 1       | 2         | 1       | 132  | 3       |
| 1Q2R        | 1          | 1       | 1    | 1       | 1        | 1       | 1         | 1       | 1         | 1       | 21   | 3       |
| 2ZM5        | 1          | 1       | 1    | 1       | 1        | 1       | 2         | 1       | 1         | 1       | 7    | 1       |
| 1R3E        | 1          | 1       | 1    | 1       | 1        | 1       | 1         | 1       | 1         | 1       | 1381 | 1       |
| 3LWR        | 1          | 1       | 1    | 1       | 1        | 1       | 1         | 1       | 1         | 1       | 120  | 3       |
| 1T0K        | 4          | 1       | 18   | 3       | 4        | 1       | 11        | 3       | 121       | 3       | 326  | 3       |
| 3OVB        | 1          | 1       | 1    | 1       | 3        | 1       | 7         | 1       | 1         | 1       | 29   | 1       |
| 3FOZ        | 1          | 1       | 1    | 1       | 1        | 1       | 2         | 1       | 1         | 1       | 1    | 1       |
| 1YVP        | 1          | 1       | 7    | 1       | 1        | 1       | 1         | 1       | 1         | 1       | 501  | 3       |
| 1C0A        | 1          | 1       | 1    | 1       | 1        | 1       | 1         | 1       | 2         | 1       | 1    | 1       |
| 2AKE        | 9          | 1       | 339  | 2       | 83       | 2       | 179       | 2       | 9         | 2       | —    | 4       |
| 2ANR        | 2          | 1       | 53   | 1       | 63       | 1       | 131       | 1       | 81        | 3       | 1324 | 3       |
| 2AZ0        | 1          | 1       | 1    | 1       | 1        | 1       | 1         | 1       | 1         | 2       | 2    | 2       |
| 2BH2        | 1          | 1       | 1    | 1       | 1        | 1       | 1         | 1       | 1         | 1       | 1    | 1       |
| 2CSX        | 1          | 1       | 1    | 1       | 1        | 1       | 1         | 1       | 22        | 3       | 1    | 1       |
| 2DU3        | 12         | 1       | 565  | 1       | 200      | 1       | 313       | 1       | 178       | 2       | —    | 4       |
| 2FK6        | 6          | 3       | 106  | 3       | 67       | 3       | 52        | 3       | 79        | 2       | 4    | 3       |
| 1DFU        | 1          | 1       | 1    | 1       | 1        | 1       | 1         | 1       | 1         | 2       | 1    | 1       |
| 2GJW        | 1          | 1       | 1    | 1       | 1        | 1       | 1         | 1       | 1         | 1       | 2    | 1       |
| 2QUX        | 1          | 1       | 1    | 1       | 4        | 1       | 5         | 1       | 63        | 1       | 41   | 3       |
| 2RFK        | 1          | 1       | 1    | 1       | 1        | 1       | 1         | 1       | 6         | 1       | 8    | 3       |
| 2XDB        | 2          | 1       | 5    | 1       | 2        | 1       | 4         | 1       | 77        | 2       | 487  | 1       |
| 2ZNI        | 1          | 1       | 1    | 1       | 1        | 1       | 1         | 1       | 1         | 1       | 1    | 1       |
| 2ZUE        | 1          | 1       | 1    | 1       | 1        | 1       | 2         | 1       | 1         | 1       | 2    | 1       |

Continued on Next Page...

Table S6 – Continued

| PDB<br>code | ITScore-PR |         | dRNA |         | DARS-RNP |         | QUASI-RNP |         | ZDOCK 2.1 |         | PMF  |         |
|-------------|------------|---------|------|---------|----------|---------|-----------|---------|-----------|---------|------|---------|
|             | rank       | quality | rank | quality | rank     | quality | rank      | quality | rank      | quality | rank | quality |
| 1F7Y        | 1          | 1       | 1    | 1       | 1        | 1       | 1         | 1       | 1         | 1       | 1    | 1       |
| 3CIY        | 1          | 1       | 14   | 1       | 1        | 1       | 2         | 1       | 21        | 2       | 603  | 2       |
| 3DD2        | 1          | 1       | 1    | 1       | 2        | 1       | 1         | 1       | 5         | 1       | 34   | 1       |
| 3EPH        | 1          | 1       | 1    | 1       | 1        | 1       | 1         | 1       | 1         | 1       | 1    | 1       |
| 3HHZ        | 1          | 1       | 13   | 1       | 51       | 3       | 33        | 3       | 674       | 3       | 2    | 2       |
| 1HQ1        | 1          | 1       | 1    | 1       | 1        | 1       | 2         | 1       | 2         | 1       | 508  | 3       |
| 3LRR        | 2          | 1       | 34   | 3       | 93       | 3       | 36        | 3       | 14        | 2       | 2    | 3       |
| 3MOJ        | 1          | 1       | 9    | 3       | 34       | 3       | 28        | 3       | 24        | 3       | 433  | 3       |
| 3OL9        | 1          | 1       | 1    | 1       | 3        | 1       | 9         | 1       | 1         | 1       | 1332 | 1       |
| 1E8O        | 1          | 1       | 2    | 1       | 68       | 1       | 30        | 1       | 27        | 3       | 1    | 1       |
| 1F7U        | 1          | 1       | 1    | 1       | 1        | 1       | 1         | 1       | 1         | 1       | 1    | 1       |
| 1IL2        | 1          | 1       | 1    | 1       | 1        | 1       | 2         | 1       | 1         | 1       | 3    | 1       |
| 1R9F        | 1          | 1       | 1    | 1       | 25       | 1       | 66        | 1       | 15        | 1       | 3    | 2       |
| 1SER        | 1          | 1       | 1    | 1       | 9        | 1       | 23        | 1       | 116       | 3       | 8    | 1       |
| 1UN6        | 1          | 1       | 2    | 3       | 9        | 1       | 28        | 1       | 11        | 3       | 1    | 1       |
| 2UWM        | 18         | 1       | 552  | 1       | 52       | 1       | 101       | 1       | 143       | 2       | 128  | 1       |
| 2ZZM        | 1          | 1       | 1    | 1       | 1        | 1       | 1         | 1       | 1         | 1       | 1715 | 1       |
| 2NUG        | 1          | 1       | 1    | 1       | 2        | 1       | 2         | 1       | 1         | 3       | 1    | 1       |
| 2BTE        | 1          | 1       | 1    | 1       | 3        | 1       | 20        | 1       | 315       | 1       | 12   | 1       |
| 2ZKO        | 1          | 1       | 1    | 1       | 2        | 1       | 3         | 1       | 2         | 1       | 2    | 3       |
| 2FMT        | 1          | 1       | 1    | 1       | 2        | 1       | 5         | 1       | 957       | 3       | 20   | 3       |
| 2VPL        | 1          | 1       | 1    | 1       | 1        | 1       | 2         | 1       | 1         | 1       | 5    | 2       |
| 1RC7        | 1          | 1       | 1    | 1       | 1        | 1       | 11        | 1       | 3         | 3       | 2    | 3       |
| 3ADD        | 1          | 1       | 1    | 1       | 16       | 1       | 36        | 1       | 256       | 1       | 1    | 1       |
| 3FTF        | 1          | 1       | 1    | 1       | 1        | 1       | 4         | 1       | 41        | 2       | 4    | 3       |
| 3HL2        | 63         | 3       | 187  | 3       | 26       | 3       | 36        | 3       | 1085      | 3       | 59   | 3       |
| 1H3E        | 1          | 1       | 2    | 1       | 8        | 1       | 11        | 1       | 7         | 2       | 728  | 1       |
| 2HW8        | 1          | 1       | 1    | 1       | 1        | 1       | 3         | 1       | 1         | 1       | 1    | 1       |
| 1OOA        | 1          | 1       | 20   | 1       | 28       | 1       | 72        | 1       | 6         | 2       | 68   | 3       |
| 1U0B        | 1          | 1       | 1    | 1       | 1        | 1       | 1         | 1       | 1         | 1       | 44   | 1       |
| 2IPY        | 1          | 1       | 1    | 1       | 1        | 1       | 1         | 1       | 6         | 1       | 1472 | 1       |
| 2R8S        | 1          | 1       | 1    | 1       | 3        | 1       | 5         | 1       | 7         | 1       | 23   | 1       |
| 2V3C        | 1          | 1       | 1    | 1       | 2        | 1       | 2         | 1       | 73        | 2       | 541  | 2       |

Table S7: The rankings and accuracy qualities of the first successful predictions for the non-native complex test cases on the protein-RNA docking benchmark by Huang and Zou.

| PDB<br>code | ITScore-PR |         | dRNA |         | DARS-RNP |         | QUASI-RNP |         | ZDOCK 2.1 |         | PMF  |         |
|-------------|------------|---------|------|---------|----------|---------|-----------|---------|-----------|---------|------|---------|
|             | rank       | quality | rank | quality | rank     | quality | rank      | quality | rank      | quality | rank | quality |
| 1QTQ        | 1          | 1       | 1    | 1       | 1        | 1       | 1         | 1       | 1         | 1       | 2    | 1       |
| 1FFY        | 1          | 1       | 1    | 1       | 1        | 1       | 2         | 1       | 1         | 2       | 1    | 1       |
| 1G1X        | 1          | 2       | 2    | 2       | 4        | 2       | 13        | 2       | 10        | 2       | 3    | 2       |
| 1N78        | 1          | 2       | 1    | 2       | 1        | 2       | 1         | 2       | 1         | 2       | 47   | 3       |
| 1GAX        | 1          | 1       | 1    | 1       | 1        | 1       | 1         | 1       | 1         | 1       | 18   | 1       |
| 1H4S        | 89         | 2       | 213  | 3       | 118      | 2       | 278       | 2       | 302       | 3       | 98   | 3       |
| 1SJ3        | 1          | 1       | 3    | 1       | 2        | 1       | 27        | 3       | 2         | 2       | 6    | 1       |
| 1MMS        | 1          | 2       | 1    | 2       | 1        | 2       | 1         | 2       | 3         | 2       | 70   | 3       |
| 1S03        | 1          | 2       | 1    | 2       | 8        | 2       | 12        | 2       | 5         | 2       | 119  | 3       |
| 1J1U        | 858        | 2       | 1245 | 2       | 621      | 2       | 1219      | 2       | 823       | 2       | —    | 4       |
| 1JBS        | 9          | 3       | 67   | 2       | 1        | 2       | 5         | 2       | 18        | 3       | 713  | 3       |
| 1JID        | 60         | 3       | 71   | 2       | 116      | 3       | 24        | 3       | 40        | 3       | 82   | 3       |
| 1K8W        | 2          | 2       | 4    | 2       | 16       | 2       | 28        | 2       | 4         | 2       | 152  | 3       |
| 1KOG        | 116        | 3       | 417  | 3       | 167      | 2       | 636       | 2       | 339       | 2       | 29   | 3       |
| 1LNG        | 1          | 1       | 1    | 1       | 1        | 1       | 1         | 1       | 1         | 2       | 71   | 3       |
| 2CZJ        | 392        | 3       | 463  | 3       | 47       | 3       | 225       | 3       | 229       | 2       | —    | 4       |
| 1Q2R        | 4          | 3       | 1    | 2       | 1        | 2       | 1         | 2       | 1         | 2       | 1646 | 2       |
| 2ZM5        | 1          | 1       | 1    | 1       | 1        | 1       | 1         | 1       | 1         | 1       | 3    | 1       |
| 1R3E        | 1          | 1       | 1    | 1       | 1        | 1       | 1         | 1       | 1         | 1       | 26   | 3       |
| 3LWR        | 1          | 1       | 1    | 1       | 1        | 1       | 1         | 1       | 1         | 1       | 37   | 2       |
| 1T0K        | 127        | 3       | 46   | 3       | 59       | 3       | 115       | 3       | 43        | 3       | —    | 4       |
| 3OVB        | 1          | 1       | 1    | 1       | 2        | 1       | 7         | 2       | 1         | 1       | 7    | 1       |
| 3FOZ        | 1          | 1       | 1    | 1       | 1        | 1       | 1         | 1       | 1         | 1       | 5    | 1       |
| 1YVP        | 32         | 3       | 435  | 2       | 17       | 2       | 45        | 2       | 60        | 2       | 346  | 3       |
| 1C0A        | 1          | 2       | 5    | 2       | 1        | 2       | 1         | 2       | 55        | 2       | 1    | 2       |
| 2AKE        | 41         | 2       | 480  | 2       | 244      | 2       | 485       | 2       | 574       | 2       | —    | 4       |
| 2ANR        | 35         | 1       | 151  | 1       | 199      | 1       | 222       | 3       | 307       | 3       | —    | 4       |
| 2AZ0        | 2          | 3       | 2    | 1       | 3        | 1       | 1         | 1       | 9         | 2       | 1    | 3       |
| 2BH2        | 1          | 2       | 1    | 2       | 1        | 2       | 3         | 2       | 1         | 2       | 87   | 2       |
| 2CSX        | 1          | 1       | 1    | 2       | 1        | 2       | 1         | 2       | 20        | 2       | 1    | 1       |
| 2DU3        | 134        | 1       | 1165 | 1       | 509      | 1       | 700       | 1       | 557       | 3       | —    | 4       |
| 2FK6        | 104        | 2       | 266  | 2       | 752      | 2       | 600       | 3       | 470       | 3       | 31   | 3       |
| 1DFU        | 2          | 2       | 1    | 2       | 4        | 2       | 3         | 2       | 1         | 3       | 3    | 2       |
| 2GJW        | 211        | 3       | 335  | 3       | 112      | 3       | 328       | 3       | 113       | 3       | —    | 4       |
| 2QUX        | 1          | 1       | 5    | 1       | 28       | 1       | 34        | 1       | 178       | 3       | 61   | 3       |
| 2RFK        | 1          | 2       | 1    | 2       | 1        | 2       | 4         | 2       | 2         | 2       | 2    | 3       |
| 2XDB        | 3          | 1       | 18   | 1       | 10       | 3       | 32        | 3       | 24        | 3       | 258  | 1       |
| 2ZNI        | 123        | 2       | 6    | 2       | 2        | 2       | 8         | 2       | 69        | 3       | 1826 | 2       |
| 2ZUE        | 1          | 1       | 1    | 1       | 1        | 1       | 1         | 1       | 1         | 2       | 1    | 1       |
| 1F7Y        | 1          | 1       | 1    | 1       | 2        | 1       | 3         | 1       | 1         | 2       | 75   | 3       |
| 3CIY        | 381        | 2       | 698  | 2       | 252      | 2       | 272       | 2       | —         | 4       | 873  | 3       |

Continued on Next Page...



Table S7 – Continued

| PDB<br>code | ITScore-PR |         | dRNA |         | DARS-RNP |         | QUASI-RNP |         | ZDOCK 2.1 |         | PMF  |         |
|-------------|------------|---------|------|---------|----------|---------|-----------|---------|-----------|---------|------|---------|
|             | rank       | quality | rank | quality | rank     | quality | rank      | quality | rank      | quality | rank | quality |
| 3DD2        | 13         | 3       | 6    | 3       | 24       | 1       | 15        | 3       | 52        | 2       | 26   | 3       |
| 3EPH        | 1          | 1       | 1    | 1       | 1        | 1       | 1         | 1       | 1         | 1       | 1    | 1       |
| 3HHZ        | 4          | 3       | 36   | 3       | 13       | 3       | 4         | 3       | 66        | 3       | 11   | 2       |
| 1HQ1        | 1          | 1       | 1    | 1       | 4        | 1       | 25        | 1       | 20        | 1       | 200  | 3       |
| 3LRR        | 2          | 1       | 21   | 3       | 60       | 3       | 73        | 3       | 8         | 3       | 3    | 3       |
| 3MOJ        | 71         | 3       | 75   | 3       | 85       | 3       | 84        | 3       | 86        | 3       | 489  | 3       |
| 3OL9        | 1          | 1       | 1    | 1       | 3        | 1       | 6         | 1       | 1         | 1       | 1458 | 1       |
| 1E8O        | 54         | 2       | 59   | 2       | 671      | 2       | 215       | 2       | 431       | 3       | 4    | 2       |
| 1F7U        | 1249       | 2       | 1    | 2       | 1        | 2       | 1         | 2       | 2         | 2       | —    | 4       |
| 1IL2        | 1674       | 3       | 43   | 3       | 7        | 3       | 26        | 3       | —         | 4       | —    | 4       |
| 1R9F        | 84         | 3       | 23   | 3       | 352      | 2       | 370       | 3       | 73        | 2       | 222  | 3       |
| 1SER        | 18         | 2       | 12   | 2       | 344      | 2       | 287       | 3       | 97        | 3       | 1    | 3       |
| 1UN6        | 1175       | 3       | 113  | 3       | 123      | 3       | 140       | 3       | 754       | 3       | 1    | 3       |
| 2UWM        | 443        | 3       | 216  | 3       | 497      | 3       | 189       | 3       | 334       | 3       | 348  | 3       |
| 2ZZM        | 1          | 2       | 1    | 2       | 1        | 2       | 1         | 2       | 3         | 3       | 1763 | 2       |
| 2NUG        | 2          | 2       | 2    | 2       | 2        | 2       | 2         | 2       | 2         | 3       | 1340 | 2       |
| 2BTE        | 3          | 2       | 1    | 3       | 30       | 3       | 44        | 3       | 21        | 3       | 231  | 3       |
| 2ZKO        | 383        | 3       | —    | 4       | —        | 4       | —         | 4       | 810       | 3       | —    | 4       |
| 2FMT        | 161        | 2       | 91   | 2       | 140      | 2       | 158       | 2       | —         | 4       | 70   | 3       |
| 2VPL        | 6          | 2       | 11   | 2       | 77       | 3       | 132       | 3       | 305       | 2       | 505  | 3       |
| 1RC7        | 2          | 2       | 3    | 3       | 29       | 2       | 75        | 3       | 35        | 2       | 9    | 3       |
| 3ADD        | 10         | 2       | 4    | 2       | 65       | 2       | 116       | 2       | 27        | 3       | 17   | 3       |
| 3FTF        | 1          | 2       | 1    | 2       | 8        | 2       | 9         | 2       | 91        | 2       | 24   | 3       |
| 3HL2        | 433        | 3       | 609  | 2       | 12       | 3       | 2         | 3       | 388       | 3       | 82   | 3       |
| 1H3E        | 6          | 2       | 351  | 2       | 120      | 2       | 251       | 2       | 917       | 2       | 57   | 3       |
| 2HW8        | —          | 4       | —    | 4       | —        | 4       | —         | 4       | —         | 4       | —    | 4       |
| 1OOA        | 780        | 3       | 129  | 3       | 977      | 3       | 1026      | 3       | 314       | 3       | —    | 4       |
| 1U0B        | 194        | 3       | 15   | 3       | 89       | 3       | 165       | 3       | —         | 4       | —    | 4       |
| 2IPY        | —          | 4       | —    | 4       | —        | 4       | —         | 4       | —         | 4       | —    | 4       |
| 2R8S        | —          | 4       | —    | 4       | —        | 4       | —         | 4       | —         | 4       | —    | 4       |
| 2V3C        | —          | 4       | —    | 4       | —        | 4       | —         | 4       | —         | 4       | —    | 4       |

Table S8: PDB codes of the 50 ‘truly’ unbound test cases from the protein-RNA docking benchmark by Huang and Zou in which the unbound protein (RNA) is in either free form or bound to an RNA (a protein) that has a sequence identity of  $< 70\%$  ( $< 30\%$ ) with the RNA (protein) in the corresponding native complex.

|      |      |      |      |      |      |      |      |      |      |      |      |
|------|------|------|------|------|------|------|------|------|------|------|------|
| 1C0A | 1DFU | 1F7Y | 1G1X | 1H4S | 1J1U | 1JBS | 1JID | 1K8W | 1KOG | 1N78 | 1Q2R |
| 1R3E | 1S03 | 1SJ3 | 1T0K | 1YVP | 2AZ0 | 2BH2 | 2CZJ | 2FK6 | 2GJW | 2QUX | 2ZNI |
| 3CIY | 3DD2 | 3LRR | 3MOJ | 3OL9 | 1F7U | 1IL2 | 1R9F | 1RC7 | 1SER | 2BTE | 2FMT |
| 2NUG | 2UWM | 2VPL | 2ZKO | 2ZZM | 3FTF | 3HL2 | 1H3E | 1OOA | 1U0B | 2HW8 | 2IPY |
| 2R8S | 2V3C |      |      |      |      |      |      |      |      |      |      |

Table S9: The rankings and accuracy qualities of the first successful predictions for the *unbound/model* cases on the protein-RNA docking benchmark by Perez-Cano et al.

| PDB<br>code | ITScore-PR |         | dRNA |         | DARS-RNP |         | QUASI-RNP |         | ZDOCK 2.1 |         | PMF  |         |
|-------------|------------|---------|------|---------|----------|---------|-----------|---------|-----------|---------|------|---------|
|             | rank       | quality | rank | quality | rank     | quality | rank      | quality | rank      | quality | rank | quality |
| 1C0A        | 136        | 3       | 61   | 3       | 37       | 3       | 22        | 3       | 325       | 3       | —    | 4       |
| 1C9S        | —          | 4       | —    | 4       | —        | 4       | —         | 4       | —         | 4       | —    | 4       |
| 1DFU        | 1          | 3       | 3    | 3       | 9        | 3       | 14        | 3       | 9         | 3       | 151  | 3       |
| 1DK1        | 6          | 3       | 1    | 2       | 62       | 3       | 110       | 3       | 48        | 3       | 14   | 3       |
| 1E7K        | 53         | 2       | 45   | 2       | 42       | 3       | 44        | 3       | 75        | 3       | 43   | 3       |
| 1E8O        | 1336       | 3       | 1300 | 3       | 1386     | 3       | 1401      | 3       | 372       | 3       | 215  | 3       |
| 1EFW        | 42         | 2       | 114  | 2       | 149      | 2       | 261       | 2       | 673       | 2       | 385  | 3       |
| 1EKZ        | 507        | 3       | 679  | 3       | 416      | 3       | 275       | 3       | 38        | 3       | 771  | 3       |
| 1F7U        | 144        | 3       | 1    | 2       | 1        | 2       | 1         | 2       | 151       | 2       | 297  | 3       |
| 1G1X        | 16         | 3       | 316  | 3       | 13       | 3       | 16        | 3       | 33        | 2       | 60   | 3       |
| 1H3E        | 8          | 2       | 450  | 2       | 268      | 2       | 425       | 2       | 1249      | 2       | —    | 4       |
| 1H4S        | 607        | 3       | 198  | 3       | 556      | 3       | 562       | 3       | 298       | 3       | 46   | 3       |
| 1HC8        | 1          | 3       | 8    | 3       | 20       | 3       | 84        | 3       | 170       | 3       | 95   | 3       |
| 1HQ1        | 86         | 3       | 26   | 3       | 209      | 3       | 162       | 3       | 395       | 3       | —    | 4       |
| 1HVU        | 10         | 3       | 9    | 3       | 61       | 3       | 174       | 3       | 79        | 3       | 13   | 3       |
| 1J1U        | 865        | 2       | 911  | 2       | 841      | 2       | 969       | 2       | —         | 4       | —    | 4       |
| 1J2B        | —          | 4       | —    | 4       | —        | 4       | —         | 4       | —         | 4       | —    | 4       |
| 1JBR        | 1          | 3       | 42   | 3       | 6        | 3       | 3         | 3       | 5         | 2       | 501  | 3       |
| 1K1G        | 28         | 3       | 14   | 3       | 15       | 3       | 34        | 3       | 28        | 3       | —    | 4       |
| 1K8W        | 1          | 2       | 4    | 2       | 1        | 2       | 1         | 2       | 8         | 2       | 65   | 3       |
| 1KOG        | 499        | 3       | 484  | 3       | 669      | 3       | 554       | 3       | 523       | 3       | 215  | 3       |
| 1KQ2        | 3          | 2       | 4    | 2       | 3        | 2       | 3         | 2       | 3         | 2       | 1    | 2       |
| 1LNG        | 192        | 3       | 33   | 3       | 123      | 3       | 95        | 3       | 675       | 3       | —    | 4       |
| 1M5O        | 3          | 2       | 647  | 2       | 12       | 2       | 74        | 2       | 1254      | 3       | 135  | 3       |
| 1M8V        | 178        | 3       | 268  | 3       | 272      | 3       | 308       | 3       | 298       | 3       | 2    | 3       |
| 1MMS        | 101        | 3       | 39   | 3       | 47       | 3       | 158       | 3       | 299       | 3       | —    | 4       |
| 1N78        | 1          | 2       | 1    | 2       | 1        | 2       | 1         | 2       | 4         | 2       | 17   | 2       |
| 1OOA        | 96         | 3       | 2    | 3       | 18       | 3       | 11        | 3       | 3         | 3       | —    | 4       |
| 1Q2R        | 3          | 3       | 2    | 2       | 3        | 2       | 1         | 2       | 2         | 2       | 43   | 3       |
| 1QF6        | 1747       | 2       | 7    | 2       | 1        | 2       | 1         | 2       | —         | 4       | 1841 | 3       |
| 1QTQ        | —          | 4       | —    | 4       | —        | 4       | —         | 4       | 1727      | 3       | —    | 4       |
| 1R3E        | 1          | 3       | 5    | 3       | 26       | 3       | 62        | 3       | 138       | 3       | 7    | 3       |
| 1RKJ        | —          | 4       | —    | 4       | —        | 4       | —         | 4       | 309       | 3       | —    | 4       |
| 1S03        | 1          | 3       | 1    | 3       | 19       | 3       | 31        | 3       | 23        | 3       | 24   | 3       |
| 1SER        | 30         | 2       | 29   | 2       | 384      | 2       | 407       | 2       | 77        | 3       | 2    | 3       |
| 1T0K        | 916        | 3       | 1236 | 3       | 805      | 3       | 1083      | 3       | 687       | 3       | —    | 4       |
| 1T4L        | 5          | 3       | 1    | 3       | 3        | 3       | 23        | 3       | 12        | 3       | 6    | 3       |
| 1U0B        | 296        | 3       | 94   | 3       | 724      | 3       | 796       | 3       | —         | 4       | —    | 4       |
| 1U63        | 1          | 2       | 5    | 2       | 27       | 2       | 62        | 2       | 44        | 2       | 7    | 2       |
| 1WNE        | 1          | 1       | 1    | 1       | 1        | 2       | 2         | 3       | 1         | 1       | 1056 | 3       |
| 1WPU        | 4          | 1       | 6    | 1       | 11       | 1       | 3         | 1       | 1         | 1       | —    | 4       |

Continued on Next Page...

Table S9 – Continued

| PDB<br>code | ITScore-PR |         | dRNA |         | DARS-RNP |         | QUASI-RNP |         | ZDOCK 2.1 |         | PMF  |         |
|-------------|------------|---------|------|---------|----------|---------|-----------|---------|-----------|---------|------|---------|
|             | rank       | quality | rank | quality | rank     | quality | rank      | quality | rank      | quality | rank | quality |
| 1WSU        | 227        | 3       | 62   | 3       | 253      | 3       | 128       | 3       | 90        | 3       | 19   | 2       |
| 1YVP        | 178        | 3       | 537  | 3       | 63       | 3       | 130       | 3       | 495       | 3       | —    | 4       |
| 2AD9        | 4          | 2       | 3    | 3       | 1        | 3       | 1         | 3       | 4         | 3       | 4    | 2       |
| 2ADB        | 1          | 3       | 1    | 3       | 1        | 2       | 3         | 3       | 15        | 3       | 1    | 3       |
| 2ADC        | 3          | 3       | 3    | 3       | 4        | 3       | 11        | 3       | 25        | 3       | 1    | 3       |
| 2AZ0        | 1          | 3       | 3    | 1       | 7        | 1       | 1         | 1       | 1         | 2       | 1    | 3       |
| 2B3J        | 1070       | 3       | 28   | 3       | 16       | 3       | 11        | 3       | 382       | 3       | —    | 4       |
| 2BH2        | 1          | 2       | 1    | 2       | 1        | 2       | 3         | 2       | 1         | 2       | 61   | 3       |
| 2BTE        | 105        | 3       | 31   | 3       | 139      | 3       | 126       | 3       | 268       | 3       | —    | 4       |
| 2CJK        | 48         | 3       | 92   | 3       | 164      | 3       | 554       | 3       | 238       | 3       | —    | 4       |
| 2CSX        | 68         | 2       | 21   | 2       | 102      | 2       | 249       | 2       | 240       | 2       | 46   | 3       |
| 2CZJ        | 373        | 2       | 440  | 2       | 99       | 2       | 288       | 2       | 101       | 2       | 798  | 3       |
| 2DB3        | —          | 4       | —    | 4       | —        | 4       | —         | 4       | —         | 4       | —    | 4       |
| 2DU3        | 430        | 3       | 1422 | 3       | 1366     | 3       | 1451      | 3       | —         | 4       | —    | 4       |
| 2ERR        | 17         | 2       | 3    | 3       | 1        | 1       | 4         | 1       | 35        | 3       | 129  | 3       |
| 2FMT        | 161        | 2       | 91   | 2       | 140      | 2       | 158       | 2       | —         | 4       | 70   | 3       |
| 2FY1        | 1          | 2       | 7    | 3       | 12       | 3       | 16        | 3       | 28        | 3       | —    | 4       |
| 2GJW        | 211        | 3       | 335  | 3       | 112      | 3       | 328       | 3       | 113       | 3       | —    | 4       |
| 2HGH        | —          | 4       | —    | 4       | —        | 4       | —         | 4       | —         | 4       | —    | 4       |
| 2HW8        | —          | 4       | —    | 4       | —        | 4       | —         | 4       | 488       | 2       | —    | 4       |
| 2IPY        | —          | 4       | —    | 4       | —        | 4       | —         | 4       | —         | 4       | —    | 4       |
| 2IX1        | 1          | 2       | 1    | 2       | 122      | 2       | 122       | 2       | 1         | 2       | 481  | 2       |
| 2JPP        | 965        | 3       | 145  | 3       | 51       | 3       | 103       | 3       | 208       | 3       | —    | 4       |
| 2QUX        | 1          | 1       | 8    | 1       | 26       | 1       | 29        | 1       | 189       | 3       | 367  | 1       |
| 2R7R        | 3          | 3       | 4    | 3       | 8        | 3       | 19        | 3       | 4         | 3       | 436  | 3       |
| 2R8S        | 777        | 3       | 888  | 3       | 828      | 3       | 1022      | 3       | 366       | 2       | —    | 4       |
| 2V3C        | —          | 4       | —    | 4       | —        | 4       | —         | 4       | —         | 4       | —    | 4       |
| 2ZKO        | 280        | 3       | 104  | 3       | 177      | 3       | 277       | 3       | 172       | 3       | 712  | 3       |
| 3BSB        | 1          | 3       | 1    | 2       | 1        | 2       | 1         | 2       | 1         | 2       | 1    | 3       |
| 3BX2        | 4          | 3       | 5    | 3       | 1        | 3       | 2         | 3       | 12        | 2       | 68   | 3       |
| 3CIY        | 381        | 2       | 698  | 2       | 252      | 2       | 272       | 2       | —         | 4       | 873  | 3       |

Figure S1: The success rate (red circles) and the average RMSD (black squares) of the predicted binding modes as a function of the iterative step for the derivation of ITScore-PR. The dashed line stands for the success rate of 100%.

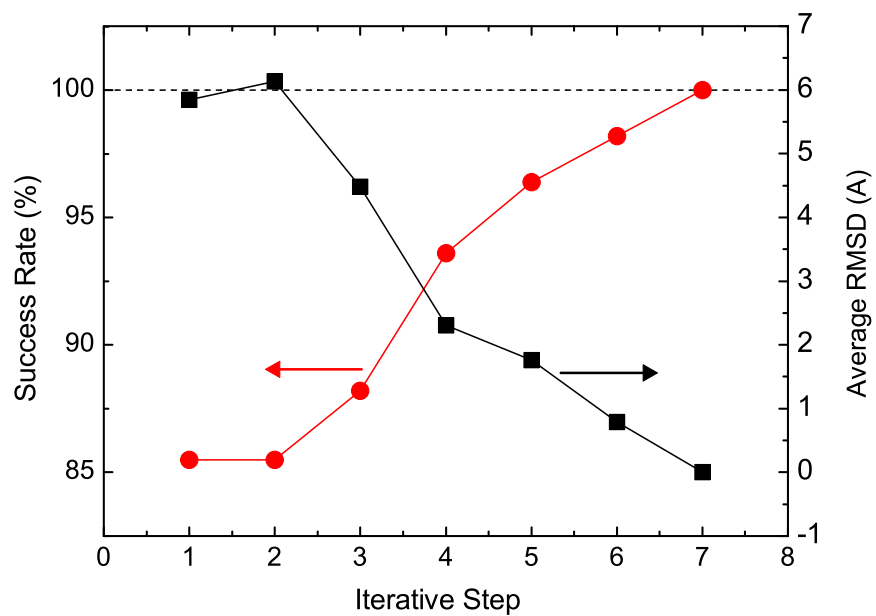

Figure S2: The RMSD distribution of the RNA binding decoys for the bound (A) and unbound (B) test case of target 1DFU from the protein-RNA docking benchmark by Huang and Zou.

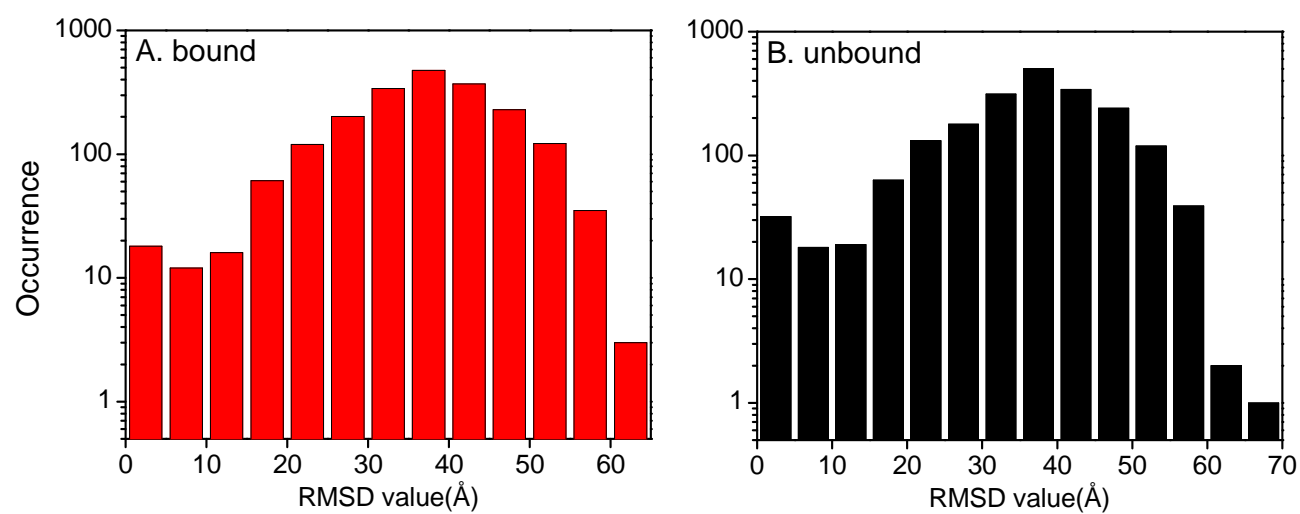

Figure S3: An illustration of sampled binding orientations of the RNA molecule (green) around the protein (magenta) for the bound (A) and unbound (B) case of target 1DFU from the protein-RNA docking benchmark by Huang and Zou. The binding positions of the RNA are roughly represented by the centers of the RNA binding modes, where the hits are highlighted in red.

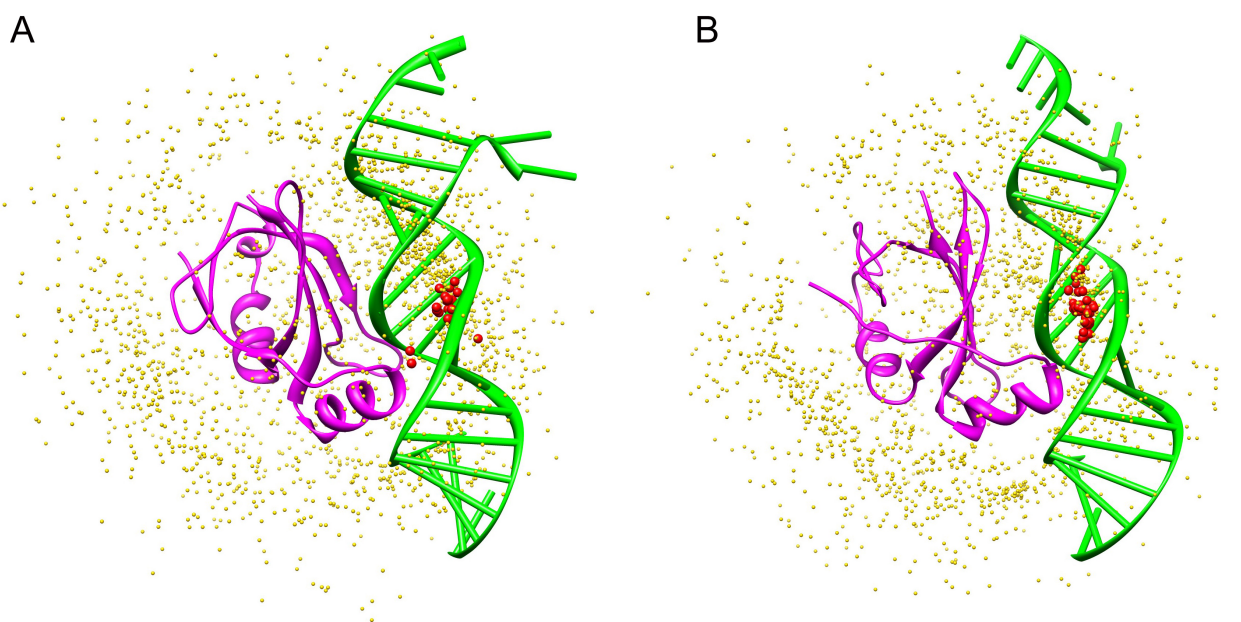

Figure S4: The success rates of ITScore-PR and five other scoring functions (dRNA, DARS-RNP, QUASI-RNP, ZDOCK 2.1 and PMF) for the bound test cases of the 72 complexes in the protein-RNA docking benchmark by Huang and Zou when the top one and top ten ranked predictions were considered, respectively.

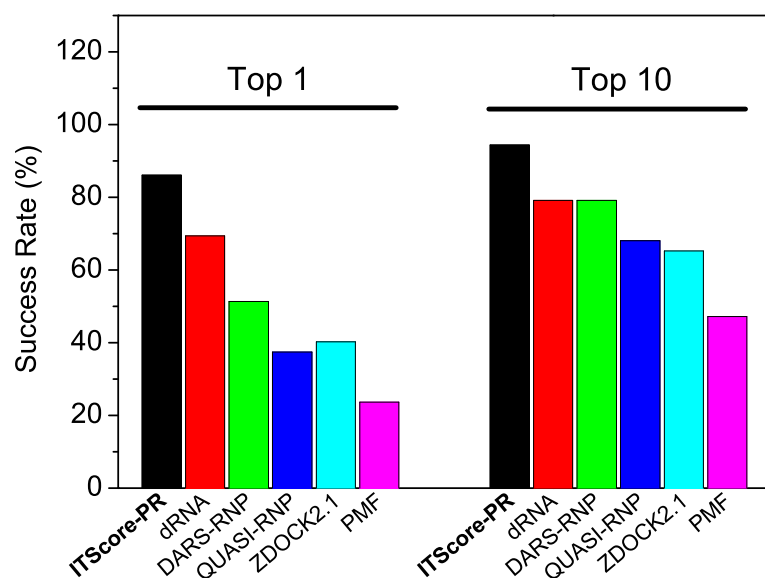



Figure S5: The success rates of ITScore-PR and five other scoring functions (dRNA, DARS-RNP, QUASI-RNP, ZDOCK 2.1 and PMF) for (a) the non-native test cases of the 72 complexes and (b) the ‘truly’ unbound test cases of the 50 complexes from the protein-RNA docking benchmark by Huang and Zou when the top one and top ten ranked predictions were considered, respectively.

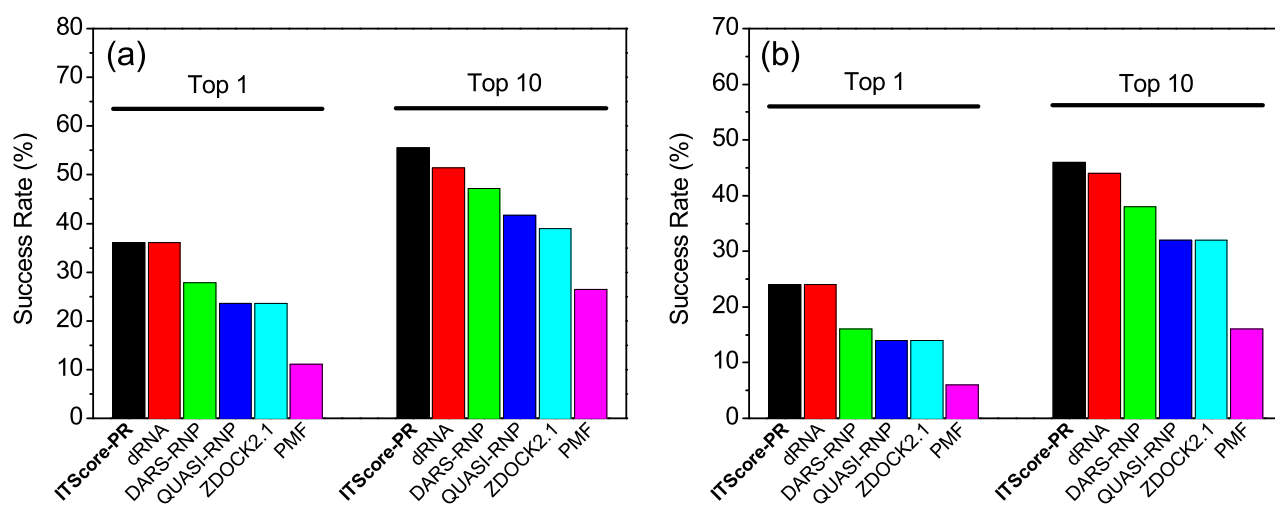

Figure S6: The success rates of ITScore-PR and five other scoring functions (dRNA, DARS-RNP, QUASI-RNP, ZDOCK 2.1 and PMF) for the unbound test cases of the 72 complexes from the protein-RNA docking benchmark by Perez-Cano et al. when the top one and top ten ranked predictions were considered, respectively.

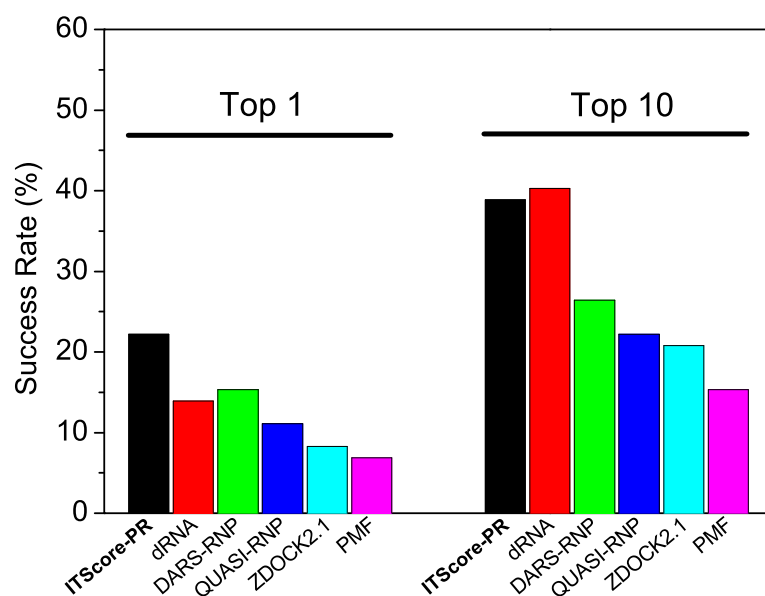

Figure S7: The success rates of ITScore-PR and four other scoring functions (DECK-RP, DARS-RNP, the Li potential and RPDock) for the RPDock docking decoys based on (a) the 43 test cases in the protein-RNA docking benchmark by Perez-Cano et al. and (b) the 50 test cases in the protein-RNA docking benchmark by Huang and Zou when the top one and top ten ranked predictions were considered, respectively.

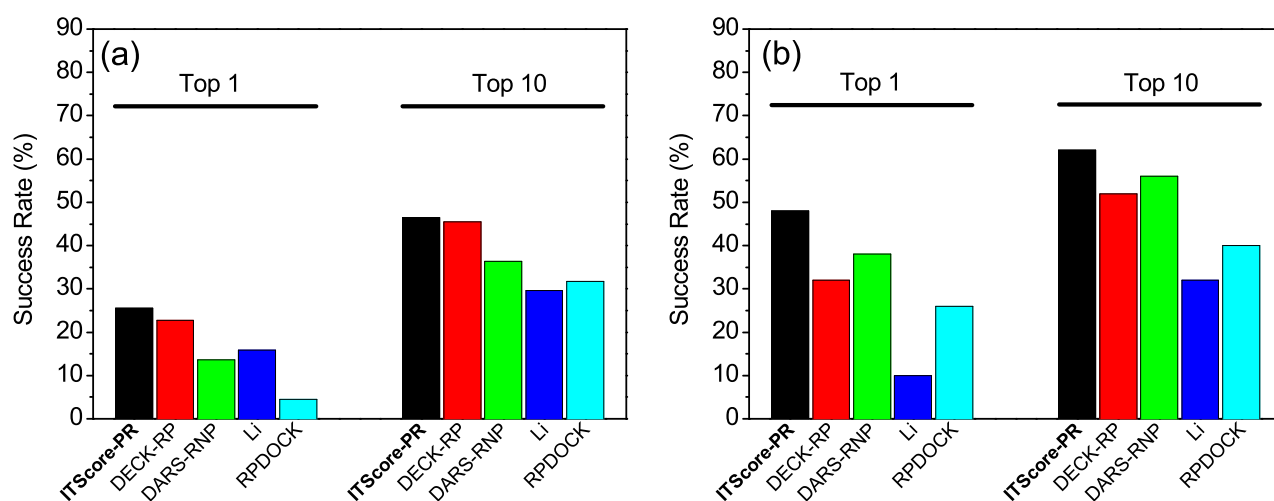

Supplement: supp_gku077_nar-03122-met-g-2013-File002.pdf [file supp_gku077_nar-03122-met-g-2013-File002.pdf]
